# Supplementary material for: Creation of Philadelphia chromosome by CRISPR/Cas9-mediated double cleavages on BCR and ABL1 genes as a model for initial event in leukemogenesis
Source: Research Square preprint supplement (doi:10.21203/rs.3.rs-1437317/v1), 2022-06-08
Supplement: Supplementary file 3 [file 3251f16134a03376e393b1a8.xlsx]

## Sheet: Sheet1
Document Name: 2021.12.02-MECOM
Plate Type: Standard Curve
User: 273003531
Document Information
Operator: 273003531
Run Date: Thursday	December 02	2021 09:40:21
Last Modified: Thursday	December 02	2021 17:46:51
Instrument Type: Applied Biosystems 7300 Real-Time PCR System
Exporting Mode: Based on Selected Wells
Comments:
SDS v1.4
Thermal Cycler Profile
Stage	Repetitions	Temperature	Time	Ramp Rate	Auto Increment
1	1	50.0 ｰC	02:00:00	Auto
2	1	95.0 ｰC	10:00:00	Auto
3	40	95.0 ｰC	00:15:00	Auto
		60.0 ｰC	01:00:00	Auto
4 (Dissociation)	1	95.0 ｰC	00:15:00	Auto
		60.0 ｰC	01:00:00	Auto
		95.0 ｰC	00:15:00	Auto
		60.0 ｰC	00:15:00	Auto
Standard 7300 Mode
Data Collection : Stage 3 Step 2
PCR Volume: 20 ｵL
Standard Curve Information
Detector Name	Slope	Intercept	R2	Number of Standards	Number of Unknowns
b-actin-S	-1.78695	32.0587	0.133076	8	32
Well	Sample Name	Detector	Task	Ct	StdDev Ct	Qty	Mean Qty	StdDev Qty
A1		MECOM	NTC	Undetermined
A2		MECOM	NTC	Undetermined
A3		MECOM	NTC	Undetermined
A4	p210(-)	MECOM	Standard	33.5592	1.23	1
A5	p210(-)	MECOM	Standard	31.6574	1.23	1
A6	p210(-)	MECOM	Standard	30.8823	1.23	1
A7	p210(-)	MECOM	Standard	31.2918	1.23	0.5
A8	p210(-)	MECOM	Standard	34.2986	1.23	0.5
A9	p210(-)	MECOM	Standard	32.3543	1.23	0.5
A10	p210(-)	MECOM	Standard	32.4908	1.23	0.25
A11	p210(-)	MECOM	Standard	33.7011	1.23	0.25
B1	p210(-)	MECOM	Standard	Undetermined	1.23
B2	p210(-)	MECOM	Standard	Undetermined	1.23
B3	p210(-)	MECOM	Standard	Undetermined	1.23
B4	p210(+)	MECOM	Unknown	32.2547	0.302	0.776809	1.09325	0.455
B5	p210(+)	MECOM	Unknown	31.6869	0.302	1.61472	1.09325	0.455
B6	p210(+)	MECOM	Unknown	32.1507	0.302	0.888215	1.09325	0.455
B7	p190(-)	MECOM	Unknown	34.3519	0.863	0.0520876	0.205381	0.222
B8	p190(-)	MECOM	Unknown	33.8119	0.863	0.104452	0.205381	0.222
B9	p190(-)	MECOM	Unknown	32.662	0.863	0.459604	0.205381	0.222
B10	p190(+)	MECOM	Unknown	37.4826	1.35	0.000922039	0.00329907	0.00468
B11	p190(+)	MECOM	Unknown	38.4081	1.35	0.000279778	0.00329907	0.00468
B12	p190(+)	MECOM	Unknown	35.7411	1.35	0.00869541	0.00329907	0.00468
