# Supplementary material for: Creation of Philadelphia chromosome by CRISPR/Cas9-mediated double cleavages on BCR and ABL1 genes as a model for initial event in leukemogenesis
Source: Research Square preprint supplement (doi:10.21203/rs.3.rs-1437317/v1), 2022-06-08
Supplement: Supplementary file 5 [file 54678c547d274662872de5a6.xlsx]

## Sheet: Sheet1
Document Name: 2021.12.2-RARB
Plate Type: Standard Curve
User: 273003531
Document Information
Operator: 273003531
Run Date: Thursday	December 02	2021 12:28:46
Last Modified: Thursday	December 02	2021 17:53:09
Instrument Type: Applied Biosystems 7300 Real-Time PCR System
Exporting Mode: Based on Selected Wells
Comments:
SDS v1.4
Thermal Cycler Profile
Stage	Repetitions	Temperature	Time	Ramp Rate	Auto Increment
1	1	50.0 ｰC	02:00:00	Auto
2	1	95.0 ｰC	10:00:00	Auto
3	40	95.0 ｰC	00:15:00	Auto
		60.0 ｰC	01:00:00	Auto
4 (Dissociation)	1	95.0 ｰC	00:15:00	Auto
		60.0 ｰC	01:00:00	Auto
		95.0 ｰC	00:15:00	Auto
		60.0 ｰC	00:15:00	Auto
Standard 7300 Mode
Data Collection : Stage 3 Step 2
PCR Volume: 20 ｵL
Standard Curve Information
Detector Name	Slope	Intercept	R2	Number of Standards	Number of Unknowns
b-actin-S	-3.28187	28.6809	0.930136	12	30
Well	Sample Name	Detector	Task	Ct	StdDev Ct	Qty	Mean Qty	StdDev Qty
E1		RARB	NTC	Undetermined
E2		RARB	NTC	Undetermined
E3		RARB	NTC	Undetermined
E4	p210(-)	RARB	Standard	28.8535	1.2	1
E5	p210(-)	RARB	Standard	28.616	1.2	1
E6	p210(-)	RARB	Standard	28.4864	1.2	1
E7	p210(-)	RARB	Standard	29.4288	1.2	0.5
E8	p210(-)	RARB	Standard	29.7868	1.2	0.5
E9	p210(-)	RARB	Standard	30.0444	1.2	0.5
E10	p210(-)	RARB	Standard	30.2863	1.2	0.25
E11	p210(-)	RARB	Standard	31.0456	1.2	0.25
E12	p210(-)	RARB	Standard	30.392	1.2	0.25
F1	p210(-)	RARB	Standard	31.6437	1.2	0.125
F2	p210(-)	RARB	Standard	31.209	1.2	0.125
F3	p210(-)	RARB	Standard	32.1613	1.2	0.125
F4	p210(+)	RARB	Unknown	28.7257	0.545	0.969049	1.03577	0.394
F5	p210(+)	RARB	Unknown	28.1425	0.545	1.45897	1.03577	0.394
F6	p210(+)	RARB	Unknown	29.2321	0.545	0.679294	1.03577	0.394
F7	p190(-)	RARB	Unknown	31.8901	0.541	0.105231	0.169076	0.0573
F8	p190(-)	RARB	Unknown	31.0772	0.541	0.186136	0.169076	0.0573
F9	p190(-)	RARB	Unknown	30.8661	0.541	0.215861	0.169076	0.0573
F10	p190(+)	RARB	Unknown	34.7545	0.986	0.0141043	0.0300066	0.0215
F11	p190(+)	RARB	Unknown	34.1574	0.986	0.0214429	0.0300066	0.0215
F12	p190(+)	RARB	Unknown	32.8286	0.986	0.0544726	0.0300066	0.0215
