# Supplementary material for: Creation of Philadelphia chromosome by CRISPR/Cas9-mediated double cleavages on BCR and ABL1 genes as a model for initial event in leukemogenesis
Source: Research Square preprint supplement (doi:10.21203/rs.3.rs-1437317/v1), 2022-06-08
Supplement: Supplementary file 6 [file 672179e5aad1c3aed865916d.xlsx]

## Sheet: Sheet1
Document Name: 2021.12-CD93
Plate Type: Standard Curve
User: 273003531
Document Information
Operator: 273003531
Run Date: Thursday	December 02	2021 09:40:21
Last Modified: Thursday	December 02	2021 17:48:56
Instrument Type: Applied Biosystems 7300 Real-Time PCR System
Exporting Mode: Based on Selected Wells
Comments:
SDS v1.4
Thermal Cycler Profile
Stage	Repetitions	Temperature	Time	Ramp Rate	Auto Increment
1	1	50.0 ｰC	02:00:00	Auto
2	1	95.0 ｰC	10:00:00	Auto
3	40	95.0 ｰC	00:15:00	Auto
		60.0 ｰC	01:00:00	Auto
4 (Dissociation)	1	95.0 ｰC	00:15:00	Auto
		60.0 ｰC	01:00:00	Auto
		95.0 ｰC	00:15:00	Auto
		60.0 ｰC	00:15:00	Auto
Standard 7300 Mode
Data Collection : Stage 3 Step 2
PCR Volume: 20 ｵL
Standard Curve Information
Detector Name	Slope	Intercept	R2	Number of Standards	Number of Unknowns
b-actin-S	-3.62833	28.512	0.887654	12	33
Well	Sample Name	Detector	Task	Ct	StdDev Ct	Qty	Mean Qty	StdDev Qty
E1		CD93	NTC	38.9678
E2		CD93	NTC	38.4787
E3		CD93	NTC	Undetermined
E4	p210(-)	CD93	Standard	29.0222	1.35	1
E5	p210(-)	CD93	Standard	28.601	1.35	1
E6	p210(-)	CD93	Standard	28.7479	1.35	1
E7	p210(-)	CD93	Standard	29.2421	1.35	0.5
E8	p210(-)	CD93	Standard	29.2884	1.35	0.5
E9	p210(-)	CD93	Standard	29.3233	1.35	0.5
E10	p210(-)	CD93	Standard	30.1454	1.35	0.25
E11	p210(-)	CD93	Standard	30.5591	1.35	0.25
E12	p210(-)	CD93	Standard	30.7969	1.35	0.25
F1	p210(-)	CD93	Standard	31.2871	1.35	0.125
F2	p210(-)	CD93	Standard	32.0009	1.35	0.125
F3	p210(-)	CD93	Standard	32.7897	1.35	0.125
F4	p210(+)	CD93	Unknown	29.0107	0.422	0.72871	0.895127	0.254
F5	p210(+)	CD93	Unknown	28.2405	0.422	1.18803	0.895127	0.254
F6	p210(+)	CD93	Unknown	28.9266	0.422	0.768645	0.895127	0.254
F7	p190(-)	CD93	Unknown	30.2816	0.0944	0.325293	0.344176	0.0207
F8	p190(-)	CD93	Unknown	30.2079	0.0944	0.340875	0.344176	0.0207
F9	p190(-)	CD93	Unknown	30.0943	0.0944	0.36636	0.344176	0.0207
F10	p190(+)	CD93	Unknown	30.9869	0.434	0.207923	0.169147	0.0437
F11	p190(+)	CD93	Unknown	31.2336	0.434	0.177785	0.169147	0.0437
F12	p190(+)	CD93	Unknown	31.8304	0.434	0.121734	0.169147	0.0437
