# Supplementary material for: Creation of Philadelphia chromosome by CRISPR/Cas9-mediated double cleavages on BCR and ABL1 genes as a model for initial event in leukemogenesis
Source: Research Square preprint supplement (doi:10.21203/rs.3.rs-1437317/v1), 2022-06-08
Supplement: Supplementary file 7 [file 87fdb0feaada323edc8b7a58.xlsx]

## Sheet: Sheet1
Document Name: 2021.12MPL
Plate Type: Standard Curve
User: 273003531
Document Information
Operator: 273003531
Run Date: Wednesday	December 01	2021 14:38:38
Last Modified: Thursday	December 02	2021 17:35:47
Instrument Type: Applied Biosystems 7300 Real-Time PCR System
Exporting Mode: Based on Selected Wells
Comments:
SDS v1.4
Thermal Cycler Profile
Stage	Repetitions	Temperature	Time	Ramp Rate	Auto Increment
1	1	50.0 ｰC	02:00:00	Auto
2	1	95.0 ｰC	10:00:00	Auto
3	40	95.0 ｰC	00:15:00	Auto
		60.0 ｰC	01:00:00	Auto
4 (Dissociation)	1	95.0 ｰC	00:15:00	Auto
		60.0 ｰC	01:00:00	Auto
		95.0 ｰC	00:15:00	Auto
		60.0 ｰC	00:15:00	Auto
Standard 7300 Mode
Data Collection : Stage 3 Step 2
PCR Volume: 20 ｵL
Standard Curve Information
Detector Name	Slope	Intercept	R2	Number of Standards	Number of Unknowns
b-actin-S	-2.68098	26.1925	0.983444	12	33
Well	Sample Name	Detector	Task	Ct	StdDev Ct	Qty	Mean Qty	StdDev Qty
A1		MPL	NTC	Undetermined
A2		MPL	NTC	Undetermined
A3		MPL	NTC	Undetermined
A4	p210(-)	MPL	Standard	26.2185	0.95	1
A5	p210(-)	MPL	Standard	26.239	0.95	1
A6	p210(-)	MPL	Standard	26.3533	0.95	1
A7	p210(-)	MPL	Standard	26.7941	0.95	0.5
A8	p210(-)	MPL	Standard	26.9904	0.95	0.5
A9	p210(-)	MPL	Standard	26.9272	0.95	0.5
A10	p210(-)	MPL	Standard	27.7748	0.95	0.25
A11	p210(-)	MPL	Standard	27.7779	0.95	0.25
A12	p210(-)	MPL	Standard	27.7411	0.95	0.25
B1	p210(-)	MPL	Standard	28.8756	0.95	0.125
B2	p210(-)	MPL	Standard	28.6437	0.95	0.125
B3	p210(-)	MPL	Standard	28.5014	0.95	0.125
B4	p210(+)	MPL	Unknown	25.7038	0.097	1.52148	1.38541	0.118
B5	p210(+)	MPL	Unknown	25.8655	0.097	1.32427	1.38541	0.118
B6	p210(+)	MPL	Unknown	25.8777	0.097	1.31048	1.38541	0.118
B7	p190(-)	MPL	Unknown	29.3065	0.223	0.0689423	0.0641098	0.0116
B8	p190(-)	MPL	Unknown	29.248	0.223	0.072494	0.0641098	0.0116
B9	p190(-)	MPL	Unknown	29.6599	0.223	0.0508932	0.0641098	0.0116
B10	p190(+)	MPL	Unknown	30.0444	0.0733	0.0365814	0.0349981	0.00217
B11	p190(+)	MPL	Unknown	30.181	0.0733	0.0325304	0.0349981	0.00217
B12	p190(+)	MPL	Unknown	30.0668	0.0733	0.0358826	0.0349981	0.00217
